# Supplementary material
Source: PubMed Central journal article supplement (PMC4196743)
Supplement: ct500394t_si_001.pdf [file ct500394t_si_001.pdf]

# Assessment of the Density Functional Tight Binding Method for Protic Ionic Liquids

## Supporting Information

Matthew A. Addicoat,<sup>a</sup> Ryan Stefanovic,<sup>b</sup> Grant Webber,<sup>b</sup> Rob Atkin,<sup>b</sup> Alister J. Page<sup>b\*</sup>.

<sup>a</sup> School of Engineering and Science, Jacobs University Bremen, Campus Ring 1, 28759 Bremen, Germany

<sup>b</sup> Newcastle Institute for Energy and Resources, The University of Newcastle, NSW 2308, Callaghan, Australia.

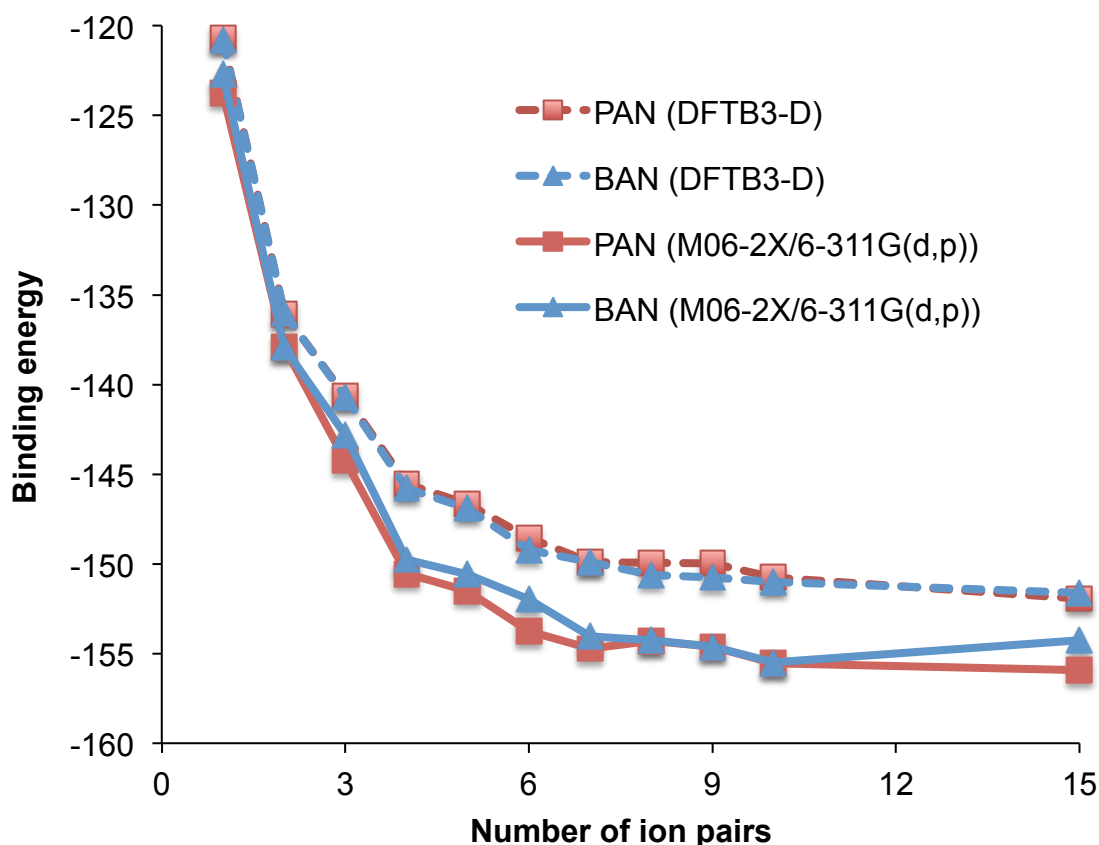

**Figure S1.** Comparison of binding energies (kcal/mol per ion pair) for propylammonium nitrate (PAN) and butyl ammonium nitrate (BAN) clusters, as a function of cluster size, computed with DFTB3-D and M06-2XS/6-311G(d,p).

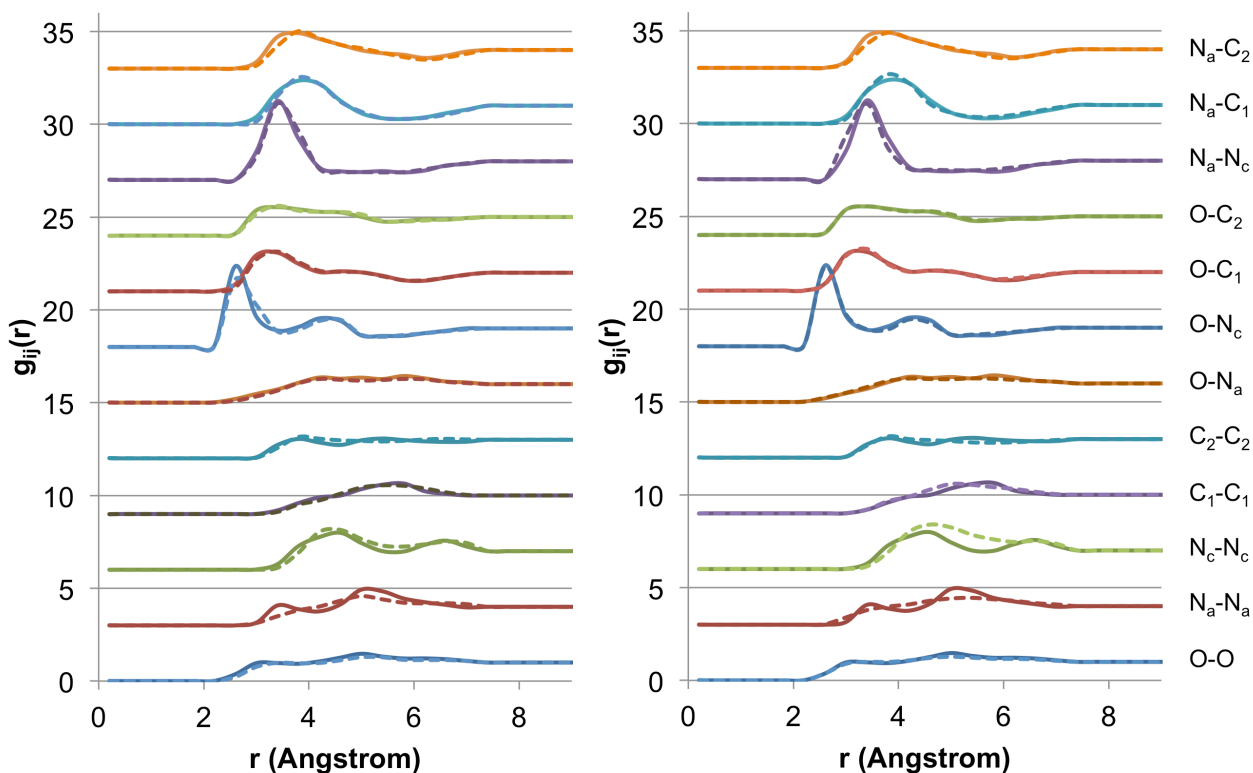

**Figure S2.** Comparison of simulated partial  $g_{ij}(r)$  functions for bulk EAN (see Figure 5), simulated using (a) DFTB3-D/mio-0-1 (solid) and DFTB3-D/3ob-1-1 (dashed), and (b) DFTB3-D/mio-0-1 (solid) and DFTB2-D/mio-0-1 (dashed).

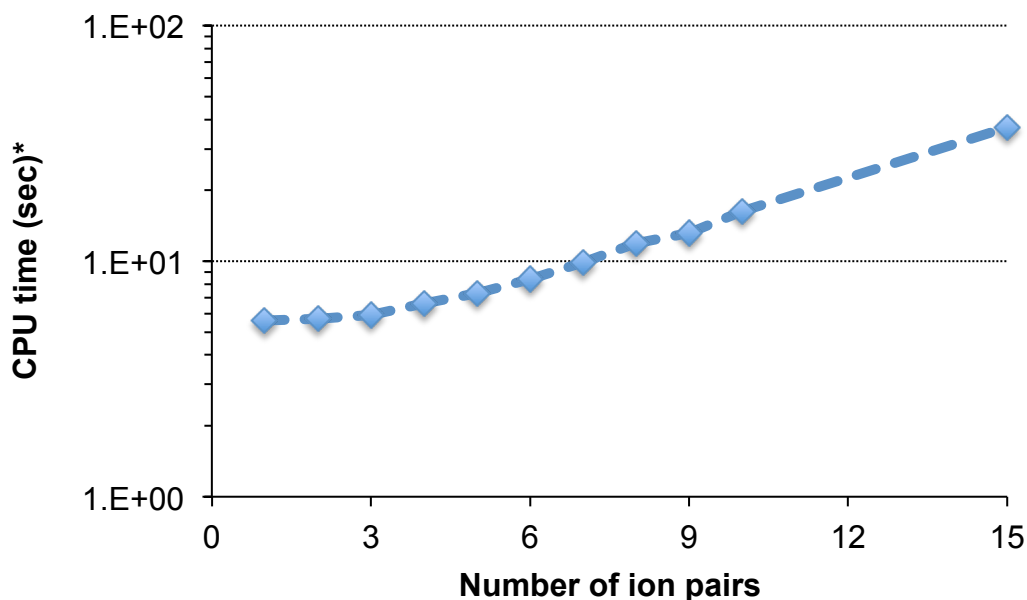

**Figure S3.** CPU time required for a single DFTB3-D/mio-0-1 energy and gradient calculation of EAN clusters, as a function of cluster size. These data were produced using an Intel hexacore Xeon E5-2667 2.9 GHz CPU and 2GB RAM. For reference, CPU times for equivalent DFT calculations

on these systems take  $\sim 1000$  times longer, however for clusters  $> 6$  ion pairs scaling is the same as for DFTB3-D/mio-0-1.
